# Supplementary material for: Literature aided determination of data quality and statistical significance threshold for gene expression studies
Source: PubMed Central journal article supplement (PMC3535704; doi:10.1186/1471-2164-13-s8-s23), 2012-12-17
Supplement: 1471-2164-13-S8-S23-S1.pdf [file 1471-2164-13-S8-S23-S1.pdf]

**Additional file 1.** Number of DE genes (with 0.05 EPv) and percentage of having abstracts that generated from different tests for PGC-1beta, IL2 and ET1 datasets.

| Gene list       | # of DE Genes |      |      | # of DE Genes with Abstracts |      |      | Ratio of DE Genes with Abstracts |      |      |
|-----------------|---------------|------|------|------------------------------|------|------|----------------------------------|------|------|
|                 | PGC-1beta     | IL2  | ET1  | PGC-1beta                    | IL2  | ET1  | PGC-1beta                        | IL2  | ET1  |
| Welch t-Test    | 2045          | 4761 | 1541 | 1634                         | 3847 | 1293 | 0.80                             | 0.81 | 0.84 |
| Mann-Whitney    | 3877          | 4498 | 2905 | 3152                         | 3625 | 2367 | 0.81                             | 0.81 | 0.81 |
| Student t-Test  | 2618          | 5001 | 1559 | 2075                         | 3951 | 1291 | 0.79                             | 0.79 | 0.83 |
| Empirical Bayes | 2933          | 5133 | 304  | 2381                         | 4104 | 207  | 0.81                             | 0.80 | 0.68 |
